# Supplementary material
Source: MDPI journal article supplement (https://www.mdpi.com/2075-163X/12/7/892)
Supplement: s1 [file s1]

**Table S1.** Sample information in the Tongshanling ore field.

| Sample | Region    | Location   |           | Lithology        |
|--------|-----------|------------|-----------|------------------|
| TSL1-1 | No. 1     | 111°29'36" | 25°17'18" | Granodiorite     |
| TSL1-2 | No. 1     | 111°29'36" | 25°17'18" | Granodiorite     |
| TSL1-3 | No. 1     | 111°29'36" | 25°17'18" | Granodiorite     |
| TSL1-4 | No. 1     | 111°29'36" | 25°17'18" | Granodiorite     |
| JY-1   | Jiangyong | 111°27'44" | 25°15'59" | Granodiorite     |
| JY-2   | Jiangyong | 111°27'44" | 25°15'59" | Granodiorite     |
| JY-3   | Jiangyong | 111°27'44" | 25°15'59" | Granodiorite     |
| JY-4   | Jiangyong | 111°27'44" | 25°15'59" | Granodiorite     |
| JY-5   | Jiangyong | 111°27'44" | 25°15'59" | Granodiorite     |
| TSL2-1 | No. 2     | 111°25'44" | 25°15'34" | Granodiorite     |
| TSL3-1 | No. 3     | 111°25'13" | 25°15'16" | Granodiorite     |
| TSL3-2 | No. 3     | 111°25'13" | 25°15'16" | Granodiorite     |
| TSL3-3 | No. 3     | 111°25'13" | 25°15'16" | Granodiorite     |
| GP-1   | ZK1101    | 111°30'3"  | 25°17'13" | Granite porphyry |
| GP-2   | ZK1101    | 111°30'3"  | 25°17'13" | Granite porphyry |
| GP-3   | ZK1101    | 111°30'3"  | 25°17'13" | Granite porphyry |

**Table S2.** The whole-rock major and trace elements compositions of Tongshanling granitoids

| Granite type                                |       | Granodiorite |       |       |       |        |        |        |        |
|---------------------------------------------|-------|--------------|-------|-------|-------|--------|--------|--------|--------|
| Granitic pluton                             |       | Jiangyong    |       |       |       | No. 1  |        |        |        |
| Sample No.                                  | JY-1  | JY-2         | JY-3  | JY-4  | JY-5  | TSL1-1 | TSL1-2 | TSL1-3 | TSL1-4 |
| Major element (wt%)                         |       |              |       |       |       |        |        |        |        |
| SiO <sub>2</sub>                            | 66.38 | 67.29        | 68.33 | 65.79 | 65.65 | 63.21  | 63.11  | 68.48  | 67.96  |
| TiO <sub>2</sub>                            | 0.47  | 0.44         | 0.43  | 0.53  | 0.46  | 0.59   | 0.59   | 0.38   | 0.42   |
| Al <sub>2</sub> O <sub>3</sub>              | 14.68 | 14.72        | 14.26 | 15.02 | 15.73 | 16.02  | 15.97  | 14.57  | 14.94  |
| Fe <sub>2</sub> O <sub>3</sub> <sup>T</sup> | 2.86  | 3.51         | 3.87  | 3.85  | 3.96  | 4.29   | 4.28   | 3.53   | 3.93   |
| MnO                                         | 0.09  | 0.10         | 0.09  | 0.08  | 0.08  | 0.10   | 0.10   | 0.08   | 0.10   |
| MgO                                         | 1.48  | 1.36         | 1.40  | 1.63  | 1.40  | 1.89   | 1.88   | 1.18   | 1.37   |
| CaO                                         | 4.83  | 3.40         | 2.96  | 3.47  | 4.05  | 4.15   | 4.14   | 2.85   | 2.96   |
| Na <sub>2</sub> O                           | 2.83  | 2.70         | 2.82  | 2.84  | 3.08  | 2.95   | 2.97   | 2.96   | 2.83   |
| K <sub>2</sub> O                            | 3.74  | 4.28         | 3.88  | 3.50  | 3.62  | 4.36   | 4.35   | 4.20   | 4.51   |
| P <sub>2</sub> O <sub>5</sub>               | 0.18  | 0.17         | 0.16  | 0.20  | 0.18  | 0.21   | 0.21   | 0.16   | 0.16   |
| LOI                                         | 1.51  | 1.64         | 1.36  | 2.62  | 1.28  | 1.80   | 1.77   | 1.25   | 1.10   |
| Total                                       | 99.05 | 99.61        | 99.56 | 99.53 | 99.49 | 99.57  | 99.36  | 99.64  | 100.28 |
| DI                                          | 72    | 75           | 76    | 73    | 72    | 70     | 70     | 77     | 76     |
| A/CNK                                       | 0.84  | 0.97         | 1.00  | 1.02  | 0.96  | 0.94   | 0.93   | 1.02   | 1.03   |
| A/NK                                        | 1.69  | 1.62         | 1.61  | 1.78  | 1.75  | 1.67   | 1.66   | 1.55   | 1.57   |
| Trace element (ppm)                         |       |              |       |       |       |        |        |        |        |
| La                                          | 35    | 33           | 33    | 32    | 31    | 15     | 15     | 37     | 26     |
| Ce                                          | 67    | 65           | 63    | 64    | 59    | 33     | 36     | 70     | 51     |
| Pr                                          | 7.6   | 7.4          | 7.2   | 7.3   | 6.8   | 4.3    | 4.4    | 7.4    | 5.7    |
| Nd                                          | 27    | 26           | 26    | 27    | 24    | 20     | 21     | 26     | 21     |
| Sm                                          | 5.19  | 5.14         | 4.99  | 5.31  | 4.91  | 5.13   | 5.45   | 4.66   | 4.29   |
| Eu                                          | 1.23  | 1.04         | 1.10  | 1.29  | 1.19  | 1.24   | 1.27   | 1.07   | 1.07   |
| Gd                                          | 4.39  | 4.55         | 4.31  | 4.57  | 4.57  | 4.69   | 4.73   | 3.83   | 3.81   |
| Tb                                          | 0.71  | 0.76         | 0.70  | 0.73  | 0.74  | 0.81   | 0.87   | 0.59   | 0.60   |
| Dy                                          | 3.83  | 4.47         | 3.90  | 4.13  | 4.19  | 5.27   | 5.33   | 3.30   | 3.53   |
| Ho                                          | 0.77  | 0.88         | 0.77  | 0.82  | 0.83  | 1.03   | 1.07   | 0.66   | 0.71   |
| Er                                          | 2.25  | 2.71         | 2.42  | 2.42  | 2.48  | 3.03   | 3.05   | 1.90   | 2.08   |
| Tm                                          | 0.30  | 0.39         | 0.35  | 0.35  | 0.35  | 0.45   | 0.46   | 0.29   | 0.31   |
| Yb                                          | 2.21  | 2.83         | 2.27  | 2.41  | 2.30  | 3.10   | 3.09   | 1.89   | 1.97   |
| Lu                                          | 0.34  | 0.44         | 0.35  | 0.36  | 0.35  | 0.43   | 0.45   | 0.30   | 0.32   |
| Y                                           | 23    | 28           | 24    | 25    | 25    | 32     | 34     | 20     | 21     |
| ΣREE                                        | 158   | 154          | 150   | 153   | 143   | 98     | 102    | 160    | 123    |
| LREE                                        | 143   | 137          | 135   | 137   | 127   | 79     | 83     | 147    | 110    |
| HREE                                        | 15    | 17           | 15    | 16    | 16    | 19     | 19     | 13     | 13     |
| LREE/HREE                                   | 9.7   | 8.0          | 9.0   | 8.7   | 8.0   | 4.2    | 4.4    | 11.5   | 8.2    |
| (La/Yb) <sub>N</sub>                        | 11.2  | 8.4          | 10.4  | 9.6   | 9.6   | 3.5    | 3.6    | 14.2   | 9.5    |
| Eu/Eu*                                      | 0.79  | 0.66         | 0.73  | 0.80  | 0.77  | 0.77   | 0.77   | 0.77   | 0.81   |
| Ce/Ce*                                      | 1.01  | 1.01         | 1.01  | 1.03  | 1.01  | 1.01   | 1.05   | 1.03   | 1.02   |
| Rb                                          | 143   | 163          | 168   | 140   | 151   | 194    | 200    | 194    | 184    |
| Ba                                          | 732   | 731          | 718   | 746   | 628   | 961    | 998    | 625    | 977    |
| Th                                          | 16.5  | 19.0         | 18.0  | 16.2  | 14.7  | 9.6    | 9.7    | 18.9   | 15.1   |
| U                                           | 5.3   | 7.3          | 6.0   | 5.6   | 4.8   | 5.9    | 5.6    | 5.0    | 4.2    |
| Ta                                          | 1.3   | 2.3          | 1.6   | 1.5   | 1.5   | 1.9    | 1.9    | 1.4    | 1.3    |
| Nb                                          | 15    | 17           | 15    | 16    | 17    | 19     | 20     | 14     | 14     |
| Sr                                          | 353   | 300          | 322   | 319   | 351   | 370    | 392    | 296    | 315    |
| Zr                                          | 168   | 170          | 133   | 167   | 156   | 173    | 181    | 138    | 140    |
| Hf                                          | 4.6   | 5.0          | 3.9   | 4.7   | 4.3   | 4.8    | 4.9    | 3.7    | 3.8    |
| Ga                                          | 16.1  | 17.3         | 16.6  | 17.3  | 19.0  | 18.1   | 19.2   | 18.45  | 18.75  |

Continued

| Granite type<br>Granitic pluton<br>Sample No. | Granodiorite<br>No. 3 |        |        | Granite porphyry<br>Tongshanling |        |        |
|-----------------------------------------------|-----------------------|--------|--------|----------------------------------|--------|--------|
|                                               | TSL3-1                | TSL3-2 | TSL3-3 | GP-1                             | GP-2   | GP-3   |
| Major element (wt%)                           |                       |        |        |                                  |        |        |
| SiO <sub>2</sub>                              | 65.91                 | 64.13  | 65.18  | 71.24                            | 73.37  | 73.78  |
| TiO <sub>2</sub>                              | 0.52                  | 0.57   | 0.54   | 0.23                             | 0.21   | 0.21   |
| Al <sub>2</sub> O <sub>3</sub>                | 14.97                 | 15.51  | 15.46  | 14.78                            | 13.80  | 13.70  |
| Fe <sub>2</sub> O <sub>3</sub>                | 4.36                  | 4.52   | 4.67   | 2.38                             | 2.26   | 2.13   |
| MnO                                           | 0.09                  | 0.08   | 0.09   | 0.06                             | 0.06   | 0.06   |
| MgO                                           | 1.60                  | 1.66   | 1.90   | 1.11                             | 0.60   | 0.55   |
| CaO                                           | 3.09                  | 3.99   | 3.46   | 0.71                             | 0.62   | 0.54   |
| Na <sub>2</sub> O                             | 1.99                  | 2.66   | 2.61   | 0.81                             | 3.04   | 3.32   |
| K <sub>2</sub> O                              | 4.22                  | 3.76   | 3.56   | 6.51                             | 4.92   | 4.82   |
| P <sub>2</sub> O <sub>5</sub>                 | 0.20                  | 0.22   | 0.21   | 0.08                             | 0.07   | 0.08   |
| LOI                                           | 2.56                  | 2.21   | 2.43   | 2.33                             | 1.42   | 1.48   |
| Total                                         | 99.51                 | 99.31  | 100.11 | 100.4                            | 100.54 | 100.84 |
| DI                                            | 73                    | 70     | 70     | 85                               | 90     | 91     |
| A/CNK                                         | 1.11                  | 0.99   | 1.07   | 1.56                             | 1.23   | 1.2    |
| A/NK                                          | 1.91                  | 1.84   | 1.9    | 1.76                             | 1.34   | 1.28   |
| Trace element (ppm)                           |                       |        |        |                                  |        |        |
| La                                            | 33                    | 37     | 31     | 41                               | 39     | 40     |
| Ce                                            | 65                    | 74     | 63     | 72                               | 69     | 70     |
| Pr                                            | 7.5                   | 8.4    | 7.4    | 7.3                              | 7.1    | 7.2    |
| Nd                                            | 27                    | 30     | 27     | 24                               | 23     | 24     |
| Sm                                            | 5.30                  | 5.92   | 5.75   | 4.14                             | 4.20   | 4.13   |
| Eu                                            | 1.12                  | 1.39   | 1.22   | 0.97                             | 0.97   | 0.90   |
| Gd                                            | 4.63                  | 4.83   | 5.05   | 3.13                             | 3.17   | 3.00   |
| Tb                                            | 0.72                  | 0.77   | 0.84   | 0.47                             | 0.48   | 0.46   |
| Dy                                            | 3.93                  | 4.17   | 4.57   | 2.46                             | 2.46   | 2.42   |
| Ho                                            | 0.79                  | 0.82   | 0.93   | 0.47                             | 0.46   | 0.47   |
| Er                                            | 2.32                  | 2.42   | 2.77   | 1.38                             | 1.35   | 1.36   |
| Tm                                            | 0.32                  | 0.33   | 0.41   | 0.22                             | 0.21   | 0.22   |
| Yb                                            | 2.16                  | 2.24   | 2.62   | 1.52                             | 1.43   | 1.49   |
| Lu                                            | 0.33                  | 0.34   | 0.41   | 0.25                             | 0.24   | 0.26   |
| Y                                             | 23                    | 25     | 28     | 16                               | 15     | 15     |
| ΣREE                                          | 154                   | 173    | 153    | 160                              | 153    | 157    |
| LREE                                          | 139                   | 157    | 135    | 150                              | 143    | 147    |
| HREE                                          | 15                    | 16     | 18     | 10                               | 10     | 10     |
| LREE/HREE                                     | 9.1                   | 9.9    | 7.7    | 15.1                             | 14.6   | 15.2   |
| (La/Yb) <sub>N</sub>                          | 10.8                  | 11.9   | 8.4    | 19.4                             | 19.4   | 19.4   |
| Eu/Eu*                                        | 0.69                  | 0.79   | 0.69   | 0.82                             | 0.81   | 0.78   |
| Ce/Ce*                                        | 1.02                  | 1.03   | 1.03   | 1.01                             | 1.02   | 1.01   |
| Rb                                            | 201                   | 144    | 140    | 391                              | 246    | 238    |
| Ba                                            | 725                   | 872    | 729    | 722                              | 727    | 680    |
| Th                                            | 16.4                  | 17.6   | 17.8   | 19.3                             | 18.1   | 18.5   |
| U                                             | 4.5                   | 5.1    | 6.8    | 8.5                              | 8.0    | 9.7    |
| Ta                                            | 1.2                   | 1.3    | 1.9    | 3.6                              | 3.2    | 3.2    |
| Nb                                            | 14                    | 15     | 16     | 46                               | 43     | 44     |
| Sr                                            | 251                   | 464    | 330    | 114                              | 255    | 219    |
| Zr                                            | 169                   | 179    | 175    | 152                              | 140    | 150    |
| Hf                                            | 4.7                   | 4.9    | 5.2    | 4.3                              | 3.9    | 4.3    |
| Ga                                            | 17.9                  | 18.3   | 17.9   | 23.6                             | 20.4   | 20.4   |

**Table S3.** Zircon LA-ICP-MS U–Pb isotopic compositions of Tongshanling granitoids.

| Spots No.                                                                     | Th  | U    | Th/U  | <sup>207</sup> Pb/ <sup>235</sup> U |        | <sup>206</sup> Pb/ <sup>238</sup> U |        | <sup>207</sup> Pb/ <sup>206</sup> Pb |        | <sup>207</sup> Pb/ <sup>235</sup> U |    | <sup>206</sup> Pb/ <sup>238</sup> U |    | <sup>207</sup> Pb/ <sup>206</sup> Pb |     |
|-------------------------------------------------------------------------------|-----|------|-------|-------------------------------------|--------|-------------------------------------|--------|--------------------------------------|--------|-------------------------------------|----|-------------------------------------|----|--------------------------------------|-----|
|                                                                               | ppm | ppm  | Ratio | Ratio                               | 2σ     | Ratio                               | 2σ     | Ratio                                | 2σ     | Age (Ma)                            | 2σ | Age (Ma)                            | 2σ | Age (Ma)                             | 2σ  |
| NO.1 granodiorite (Concordia age = 163.72 ± 0.38 Ma, MSWD =0.8, n = 14)       |     |      |       |                                     |        |                                     |        |                                      |        |                                     |    |                                     |    |                                      |     |
| TAL1-1-1                                                                      | 457 | 1343 | 0.34  | 0.1797                              | 0.0090 | 0.0250                              | 0.0010 | 0.0478                               | 0.0024 | 168                                 | 8  | 159                                 | 6  | 80                                   | 110 |
| TAL1-1-2                                                                      | 266 | 1789 | 0.15  | 0.2010                              | 0.0130 | 0.0246                              | 0.0012 | 0.0542                               | 0.0027 | 185                                 | 11 | 157                                 | 8  | 350                                  | 110 |
| TAL1-1-3                                                                      | 481 | 1797 | 0.27  | 0.1830                              | 0.0300 | 0.0250                              | 0.0018 | 0.0473                               | 0.0070 | 170                                 | 26 | 159                                 | 11 | 50                                   | 310 |
| TAL1-1-4                                                                      | 90  | 356  | 0.25  | 0.1876                              | 0.0076 | 0.0257                              | 0.0003 | 0.0520                               | 0.0021 | 175                                 | 7  | 164                                 | 2  | 240                                  | 84  |
| TAL1-1-5                                                                      | 347 | 1545 | 0.22  | 0.1940                              | 0.0120 | 0.0256                              | 0.0008 | 0.0505                               | 0.0028 | 179                                 | 10 | 163                                 | 5  | 180                                  | 110 |
| TAL1-1-6                                                                      | 386 | 983  | 0.39  | 0.2000                              | 0.0100 | 0.0261                              | 0.0005 | 0.0525                               | 0.0027 | 185                                 | 9  | 166                                 | 3  | 270                                  | 100 |
| TAL1-1-7                                                                      | 396 | 1335 | 0.30  | 0.2030                              | 0.0380 | 0.0253                              | 0.0023 | 0.0519                               | 0.0090 | 186                                 | 32 | 161                                 | 14 | 230                                  | 370 |
| TAL1-1-8                                                                      | 343 | 450  | 0.76  | 0.2010                              | 0.0320 | 0.0251                              | 0.0015 | 0.0514                               | 0.0080 | 185                                 | 28 | 160                                 | 9  | 210                                  | 340 |
| TAL1-1-9                                                                      | 557 | 1108 | 0.50  | 0.1850                              | 0.0180 | 0.0259                              | 0.0009 | 0.0468                               | 0.0046 | 171                                 | 16 | 165                                 | 6  | 70                                   | 170 |
| TAL1-1-10                                                                     | 308 | 1162 | 0.27  | 0.1919                              | 0.0057 | 0.0257                              | 0.0004 | 0.0496                               | 0.0011 | 178                                 | 5  | 164                                 | 3  | 168                                  | 47  |
| TAL1-1-11                                                                     | 321 | 454  | 0.71  | 0.1769                              | 0.0059 | 0.0258                              | 0.0002 | 0.0493                               | 0.0016 | 165                                 | 5  | 164                                 | 2  | 127                                  | 68  |
| TAL1-1-12                                                                     | 440 | 2107 | 0.21  | 0.1980                              | 0.0250 | 0.0255                              | 0.0014 | 0.0499                               | 0.0051 | 183                                 | 21 | 162                                 | 9  | 170                                  | 220 |
| TAL1-1-13                                                                     | 159 | 354  | 0.45  | 0.1863                              | 0.0071 | 0.0260                              | 0.0003 | 0.0506                               | 0.0018 | 173                                 | 6  | 166                                 | 2  | 194                                  | 77  |
| TAL1-1-14                                                                     | 285 | 1341 | 0.21  | 0.1910                              | 0.0140 | 0.0253                              | 0.0005 | 0.0501                               | 0.0041 | 177                                 | 12 | 161                                 | 3  | 180                                  | 170 |
| Jiangyong granodiorite (Concordia age = 159.37 ± 0.62 Ma, MSWD =0.26, n = 19) |     |      |       |                                     |        |                                     |        |                                      |        |                                     |    |                                     |    |                                      |     |
| Jiangyong-1-1                                                                 | 133 | 532  | 0.25  | 0.1780                              | 0.0100 | 0.0253                              | 0.0010 | 0.0501                               | 0.0022 | 166                                 | 9  | 161                                 | 6  | 176                                  | 96  |
| Jiangyong-1-2                                                                 | 253 | 999  | 0.25  | 0.1753                              | 0.0092 | 0.0249                              | 0.0009 | 0.0499                               | 0.0019 | 164                                 | 8  | 159                                 | 6  | 172                                  | 80  |
| Jiangyong-1-3                                                                 | 289 | 992  | 0.29  | 0.1780                              | 0.0140 | 0.0250                              | 0.0008 | 0.0504                               | 0.0032 | 166                                 | 12 | 159                                 | 5  | 190                                  | 140 |
| Jiangyong-1-4                                                                 | 82  | 229  | 0.36  | 0.1740                              | 0.0140 | 0.0248                              | 0.0011 | 0.0510                               | 0.0038 | 162                                 | 12 | 158                                 | 7  | 160                                  | 150 |
| Jiangyong-1-5                                                                 | 422 | 2000 | 0.21  | 0.1758                              | 0.0083 | 0.0251                              | 0.0010 | 0.0497                               | 0.0012 | 164                                 | 7  | 160                                 | 6  | 170                                  | 55  |
| Jiangyong-1-6                                                                 | 546 | 1072 | 0.51  | 0.1760                              | 0.0100 | 0.0254                              | 0.0008 | 0.0494                               | 0.0020 | 164                                 | 9  | 162                                 | 5  | 150                                  | 87  |
| Jiangyong-1-7                                                                 | 710 | 1583 | 0.45  | 0.1820                              | 0.0110 | 0.0255                              | 0.0011 | 0.0505                               | 0.0013 | 169                                 | 9  | 162                                 | 7  | 203                                  | 56  |
| Jiangyong-1-8                                                                 | 150 | 523  | 0.29  | 0.1740                              | 0.0110 | 0.0251                              | 0.0010 | 0.0504                               | 0.0023 | 162                                 | 9  | 159                                 | 6  | 180                                  | 98  |
| Jiangyong-1-9                                                                 | 435 | 698  | 0.62  | 0.1653                              | 0.0085 | 0.0241                              | 0.0009 | 0.0491                               | 0.0022 | 155                                 | 7  | 154                                 | 6  | 144                                  | 97  |
| Jiangyong-1-10                                                                | 252 | 818  | 0.31  | 0.1680                              | 0.0091 | 0.0250                              | 0.0011 | 0.0490                               | 0.0020 | 157                                 | 8  | 159                                 | 7  | 132                                  | 88  |
| Jiangyong-1-11                                                                | 500 | 1425 | 0.35  | 0.1697                              | 0.0070 | 0.0249                              | 0.0009 | 0.0482                               | 0.0016 | 159                                 | 6  | 159                                 | 6  | 102                                  | 72  |
| Jiangyong-1-12                                                                | 437 | 1877 | 0.23  | 0.1762                              | 0.0084 | 0.0252                              | 0.0009 | 0.0494                               | 0.0014 | 164                                 | 7  | 160                                 | 6  | 155                                  | 60  |
| Jiangyong-1-13                                                                | 498 | 2250 | 0.22  | 0.1767                              | 0.0072 | 0.0249                              | 0.0007 | 0.0500                               | 0.0014 | 165                                 | 6  | 159                                 | 4  | 184                                  | 62  |
| Jiangyong-1-14                                                                | 351 | 741  | 0.47  | 0.1770                              | 0.0100 | 0.0254                              | 0.0008 | 0.0490                               | 0.0023 | 165                                 | 9  | 162                                 | 5  | 125                                  | 99  |
| Jiangyong-1-15                                                                | 270 | 740  | 0.36  | 0.1760                              | 0.0110 | 0.0249                              | 0.0010 | 0.0494                               | 0.0021 | 164                                 | 9  | 158                                 | 6  | 156                                  | 90  |
| Jiangyong-1-16                                                                | 233 | 859  | 0.27  | 0.1734                              | 0.0079 | 0.0249                              | 0.0009 | 0.0502                               | 0.0024 | 162                                 | 7  | 158                                 | 6  | 190                                  | 100 |
| Jiangyong-1-17                                                                | 365 | 1657 | 0.22  | 0.1789                              | 0.0076 | 0.0249                              | 0.0008 | 0.0507                               | 0.0019 | 167                                 | 7  | 159                                 | 5  | 211                                  | 80  |
| Jiangyong-1-18                                                                | 498 | 2188 | 0.23  | 0.1788                              | 0.0078 | 0.0250                              | 0.0009 | 0.0508                               | 0.0012 | 167                                 | 7  | 159                                 | 6  | 220                                  | 54  |
| NO.2 granodiorite (Concordia age = 157.84 ± 0.60 Ma, MSWD =0.23, n = 16)      |     |      |       |                                     |        |                                     |        |                                      |        |                                     |    |                                     |    |                                      |     |
| TSL2-1-1                                                                      | 431 | 2214 | 0.19  | 0.1641                              | 0.0072 | 0.0249                              | 0.0007 | 0.0485                               | 0.0015 | 154                                 | 6  | 159                                 | 4  | 119                                  | 68  |
| TSL2-1-2                                                                      | 424 | 2051 | 0.21  | 0.1703                              | 0.0074 | 0.0251                              | 0.0009 | 0.0498                               | 0.0011 | 160                                 | 7  | 160                                 | 5  | 174                                  | 48  |
| TSL2-1-3                                                                      | 398 | 2047 | 0.19  | 0.1872                              | 0.0092 | 0.0249                              | 0.0007 | 0.0544                               | 0.0016 | 174                                 | 8  | 159                                 | 4  | 364                                  | 65  |
| TSL2-1-4                                                                      | 230 | 1523 | 0.15  | 0.1683                              | 0.0056 | 0.0247                              | 0.0007 | 0.0503                               | 0.0013 | 158                                 | 5  | 157                                 | 4  | 197                                  | 59  |
| TSL2-1-5                                                                      | 344 | 1940 | 0.18  | 0.1733                              | 0.0073 | 0.0252                              | 0.0007 | 0.0499                               | 0.0014 | 162                                 | 6  | 160                                 | 4  | 177                                  | 62  |
| TSL2-1-6                                                                      | 583 | 2233 | 0.26  | 0.1748                              | 0.0069 | 0.0249                              | 0.0007 | 0.0519                               | 0.0016 | 163                                 | 6  | 158                                 | 5  | 271                                  | 69  |
| TSL2-1-7                                                                      | 210 | 1327 | 0.16  | 0.1682                              | 0.0089 | 0.0247                              | 0.0009 | 0.0493                               | 0.0015 | 157                                 | 8  | 157                                 | 5  | 158                                  | 71  |
| TSL2-1-8                                                                      | 347 | 1990 | 0.17  | 0.1693                              | 0.0059 | 0.0247                              | 0.0008 | 0.0501                               | 0.0011 | 159                                 | 5  | 157                                 | 5  | 189                                  | 49  |
| TSL2-1-9                                                                      | 245 | 1505 | 0.16  | 0.1672                              | 0.0089 | 0.0244                              | 0.0009 | 0.0498                               | 0.0015 | 156                                 | 8  | 155                                 | 6  | 171                                  | 64  |
| TSL2-1-10                                                                     | 386 | 1616 | 0.24  | 0.1581                              | 0.0073 | 0.0245                              | 0.0007 | 0.0472                               | 0.0017 | 149                                 | 6  | 156                                 | 5  | 59                                   | 77  |
| TSL2-1-11                                                                     | 395 | 2122 | 0.19  | 0.1671                              | 0.0071 | 0.0249                              | 0.0006 | 0.0493                               | 0.0018 | 157                                 | 6  | 158                                 | 4  | 151                                  | 82  |
| TSL2-1-12                                                                     | 361 | 2140 | 0.17  | 0.1662                              | 0.0068 | 0.0246                              | 0.0009 | 0.0493                               | 0.0011 | 156                                 | 6  | 157                                 | 6  | 153                                  | 49  |
| TSL2-1-13                                                                     | 342 | 1880 | 0.18  | 0.1810                              | 0.0110 | 0.0243                              | 0.0010 | 0.0533                               | 0.0014 | 168                                 | 9  | 156                                 | 6  | 321                                  | 59  |
| TSL2-1-14                                                                     | 218 | 1400 | 0.16  | 0.1681                              | 0.0063 | 0.0251                              | 0.0007 | 0.0491                               | 0.0014 | 158                                 | 6  | 160                                 | 4  | 141                                  | 63  |
| TSL2-1-15                                                                     | 359 | 2026 | 0.18  | 0.1670                              | 0.0069 | 0.0243                              | 0.0009 | 0.0505                               | 0.0013 | 157                                 | 6  | 155                                 | 6  | 202                                  | 56  |
| TSL2-1-16                                                                     | 208 | 1545 | 0.13  | 0.1692                              | 0.0073 | 0.0245                              | 0.0008 | 0.0504                               | 0.0016 | 158                                 | 6  | 156                                 | 5  | 195                                  | 70  |

Continued

| Spots No.                                                                          | Th<br>ppm | U<br>ppm | Th/U<br>Ratio | <sup>207</sup> Pb/ <sup>235</sup> U<br>Ratio<br>2σ | <sup>206</sup> Pb/ <sup>238</sup> U<br>Ratio<br>2σ | <sup>207</sup> Pb/ <sup>206</sup> Pb<br>Ratio<br>2σ | <sup>207</sup> Pb/ <sup>235</sup> U<br>Age (Ma)<br>2σ | <sup>206</sup> Pb/ <sup>238</sup> U<br>Age (Ma)<br>2σ | <sup>207</sup> Pb/ <sup>206</sup> Pb<br>Age (Ma)<br>2σ |
|------------------------------------------------------------------------------------|-----------|----------|---------------|----------------------------------------------------|----------------------------------------------------|-----------------------------------------------------|-------------------------------------------------------|-------------------------------------------------------|--------------------------------------------------------|
| NO.3 granodiorite (Concordia age = 154.67 ± 0.57 Ma, MSWD = 0.07, n = 20)          |           |          |               |                                                    |                                                    |                                                     |                                                       |                                                       |                                                        |
| TSL3-1-1                                                                           | 301       | 1911     | 0.16          | 0.1685 0.0073                                      | 0.0244 0.0007                                      | 0.0499 0.0011                                       | 159 7                                                 | 155 5                                                 | 188 49                                                 |
| TSL3-1-2                                                                           | 298       | 1753     | 0.17          | 0.1670 0.0082                                      | 0.0243 0.0009                                      | 0.0498 0.0013                                       | 156 7                                                 | 155 6                                                 | 183 56                                                 |
| TSL3-1-3                                                                           | 287       | 1704     | 0.17          | 0.1656 0.0070                                      | 0.0242 0.0008                                      | 0.0497 0.0013                                       | 155 6                                                 | 154 5                                                 | 171 56                                                 |
| TSL3-1-4                                                                           | 376       | 1521     | 0.25          | 0.1723 0.0072                                      | 0.0243 0.0008                                      | 0.0517 0.0013                                       | 162 7                                                 | 155 5                                                 | 255 58                                                 |
| TSL3-1-5                                                                           | 429       | 2077     | 0.21          | 0.1668 0.0063                                      | 0.0243 0.0007                                      | 0.0502 0.0012                                       | 157 6                                                 | 155 5                                                 | 192 53                                                 |
| TSL3-1-6                                                                           | 432       | 2169     | 0.20          | 0.1697 0.0072                                      | 0.0244 0.0008                                      | 0.0506 0.0012                                       | 159 6                                                 | 156 5                                                 | 210 52                                                 |
| TSL3-1-7                                                                           | 355       | 1794     | 0.20          | 0.1654 0.0064                                      | 0.0246 0.0008                                      | 0.0486 0.0013                                       | 155 6                                                 | 156 5                                                 | 122 59                                                 |
| TSL3-1-8                                                                           | 324       | 1981     | 0.16          | 0.1690 0.0072                                      | 0.0244 0.0006                                      | 0.0504 0.0019                                       | 158 6                                                 | 155 4                                                 | 198 83                                                 |
| TSL3-1-9                                                                           | 363       | 1805     | 0.20          | 0.1702 0.0079                                      | 0.0242 0.0009                                      | 0.0510 0.0014                                       | 159 7                                                 | 154 6                                                 | 223 59                                                 |
| TSL3-1-10                                                                          | 451       | 2166     | 0.21          | 0.1657 0.0072                                      | 0.0242 0.0009                                      | 0.0495 0.0012                                       | 155 6                                                 | 154 5                                                 | 160 55                                                 |
| TSL3-1-11                                                                          | 466       | 1020     | 0.46          | 0.1728 0.0085                                      | 0.0241 0.0009                                      | 0.0516 0.0015                                       | 161 7                                                 | 154 6                                                 | 251 66                                                 |
| TSL3-1-12                                                                          | 388       | 2105     | 0.18          | 0.1675 0.0066                                      | 0.0243 0.0008                                      | 0.0499 0.0013                                       | 157 6                                                 | 155 5                                                 | 177 56                                                 |
| TSL3-1-13                                                                          | 479       | 2470     | 0.19          | 0.1681 0.0086                                      | 0.0241 0.0008                                      | 0.0509 0.0025                                       | 158 7                                                 | 153 5                                                 | 230 110                                                |
| TSL3-1-14                                                                          | 329       | 1753     | 0.19          | 0.1717 0.0076                                      | 0.0242 0.0009                                      | 0.0515 0.0015                                       | 161 7                                                 | 154 5                                                 | 244 63                                                 |
| TSL3-1-15                                                                          | 251       | 1572     | 0.16          | 0.1663 0.0088                                      | 0.0242 0.0009                                      | 0.0501 0.0018                                       | 156 8                                                 | 154 6                                                 | 183 77                                                 |
| TSL3-1-16                                                                          | 777       | 1500     | 0.52          | 0.1750 0.0094                                      | 0.0246 0.0008                                      | 0.0519 0.0018                                       | 163 8                                                 | 156 5                                                 | 260 76                                                 |
| TSL3-1-17                                                                          | 280       | 1853     | 0.15          | 0.1717 0.0092                                      | 0.0243 0.0009                                      | 0.0506 0.0013                                       | 160 8                                                 | 155 6                                                 | 208 58                                                 |
| TSL3-1-18                                                                          | 413       | 2112     | 0.20          | 0.1679 0.0088                                      | 0.0242 0.0009                                      | 0.0495 0.0014                                       | 157 8                                                 | 154 6                                                 | 169 63                                                 |
| TSL3-1-19                                                                          | 219       | 1194     | 0.18          | 0.1750 0.0110                                      | 0.0246 0.0010                                      | 0.0507 0.0019                                       | 163 10                                                | 157 6                                                 | 206 84                                                 |
| TSL3-1-20                                                                          | 297       | 492      | 0.60          | 0.1678 0.0096                                      | 0.0244 0.0009                                      | 0.0502 0.0025                                       | 157 8                                                 | 155 6                                                 | 170 100                                                |
| Tongshanling granite porphyry (Concordia age = 161.1 ± 0.3 Ma, MSWD = 1.9, n = 17) |           |          |               |                                                    |                                                    |                                                     |                                                       |                                                       |                                                        |
| GP-1-1                                                                             | 456       | 1613     | 0.28          | 0.1815 0.0041                                      | 0.0251 0.0002                                      | 0.0521 0.0011                                       | 169 4                                                 | 160 1                                                 | 300 50                                                 |
| GP-1-2                                                                             | 618       | 2169     | 0.28          | 0.1708 0.0036                                      | 0.0247 0.0002                                      | 0.0499 0.0011                                       | 160 3                                                 | 157 1                                                 | 187 18                                                 |
| GP-1-3                                                                             | 975       | 2993     | 0.33          | 0.1861 0.0040                                      | 0.0255 0.0002                                      | 0.0526 0.0012                                       | 173 3                                                 | 162 1                                                 | 322 52                                                 |
| GP-1-4                                                                             | 746       | 2200     | 0.34          | 0.1829 0.0044                                      | 0.0251 0.0002                                      | 0.0525 0.0013                                       | 171 4                                                 | 160 1                                                 | 306 53                                                 |
| GP-1-5                                                                             | 791       | 1882     | 0.42          | 0.1824 0.0040                                      | 0.0261 0.0002                                      | 0.0504 0.0011                                       | 170 4                                                 | 166 1                                                 | 217 52                                                 |
| GP-1-6                                                                             | 457       | 1875     | 0.24          | 0.1691 0.0034                                      | 0.0251 0.0002                                      | 0.0489 0.0010                                       | 159 3                                                 | 160 1                                                 | 143 45                                                 |
| GP-1-7                                                                             | 421       | 1756     | 0.24          | 0.1932 0.0047                                      | 0.0259 0.0002                                      | 0.0541 0.0013                                       | 179 4                                                 | 165 1                                                 | 376 56                                                 |
| GP-1-8                                                                             | 323       | 1501     | 0.22          | 0.1873 0.0049                                      | 0.0253 0.0002                                      | 0.0536 0.0014                                       | 174 4                                                 | 161 1                                                 | 354 56                                                 |
| GP-1-9                                                                             | 414       | 1627     | 0.25          | 0.1752 0.0036                                      | 0.0253 0.0002                                      | 0.0500 0.0010                                       | 164 3                                                 | 161 1                                                 | 198 46                                                 |
| GP-1-10                                                                            | 473       | 1910     | 0.25          | 0.1773 0.0046                                      | 0.0258 0.0002                                      | 0.0495 0.0013                                       | 166 4                                                 | 164 1                                                 | 169 63                                                 |
| GP-1-11                                                                            | 373       | 1307     | 0.29          | 0.1750 0.0048                                      | 0.0256 0.0002                                      | 0.0493 0.0014                                       | 164 4                                                 | 163 1                                                 | 161 69                                                 |
| GP-1-12                                                                            | 499       | 1532     | 0.33          | 0.1787 0.0054                                      | 0.0252 0.0002                                      | 0.0511 0.0015                                       | 167 5                                                 | 160 1                                                 | 243 67                                                 |
| GP-1-13                                                                            | 281       | 1264     | 0.22          | 0.1722 0.0049                                      | 0.0256 0.0003                                      | 0.0486 0.0014                                       | 161 4                                                 | 163 2                                                 | 132 69                                                 |
| GP-1-14                                                                            | 635       | 2201     | 0.29          | 0.1756 0.0043                                      | 0.0250 0.0002                                      | 0.0508 0.0012                                       | 164 4                                                 | 159 2                                                 | 228 56                                                 |
| GP-1-15                                                                            | 471       | 2182     | 0.22          | 0.1819 0.0036                                      | 0.0259 0.0002                                      | 0.0507 0.0010                                       | 170 3                                                 | 165 1                                                 | 228 44                                                 |
| GP-1-16                                                                            | 424       | 1809     | 0.23          | 0.1754 0.0040                                      | 0.0255 0.0002                                      | 0.0496 0.0011                                       | 164 3                                                 | 163 1                                                 | 176 52                                                 |
| GP-1-17                                                                            | 599       | 2069     | 0.29          | 0.1746 0.0043                                      | 0.0250 0.0002                                      | 0.0506 0.0013                                       | 163 4                                                 | 159 1                                                 | 233 57                                                 |

**Table S4.** Zircon Lu–Hf isotopic compositions for the Tongshanling granitoids.

| Spot                          | $^{176}\text{Yb}/^{177}\text{Hf}$ | 2 $\sigma$ | $^{176}\text{Lu}/^{177}\text{Hf}$ | 2 $\sigma$ | $^{176}\text{Hf}/^{177}\text{Hf}$ | 2 $\sigma$ | Age (Ma) | $f_{\text{Lu/Hf}}$ | $\varepsilon_{\text{Hf}}(t)$ | TDM1 | TDMC | ( $^{176}\text{Hf}/^{177}\text{Hf}$ ) <sub>i</sub> |
|-------------------------------|-----------------------------------|------------|-----------------------------------|------------|-----------------------------------|------------|----------|--------------------|------------------------------|------|------|----------------------------------------------------|
| NO.1 granodiorite             |                                   |            |                                   |            |                                   |            |          |                    |                              |      |      |                                                    |
| TAL1-1-1                      | 0.045193                          | 0.000616   | 0.001657                          | 0.000022   | 0.282420                          | 0.000012   | 159      | −0.95              | −9.14                        | 1197 | 1789 | 0.282415                                           |
| TAL1-1-2                      | 0.058415                          | 0.000936   | 0.002131                          | 0.000026   | 0.282448                          | 0.000013   | 156      | −0.94              | −8.26                        | 1171 | 1730 | 0.282442                                           |
| TAL1-1-3                      | 0.047521                          | 0.000443   | 0.001680                          | 0.000015   | 0.282469                          | 0.000012   | 160      | −0.95              | −7.39                        | 1127 | 1678 | 0.282464                                           |
| TAL1-1-4                      | 0.033226                          | 0.000498   | 0.001247                          | 0.000018   | 0.282463                          | 0.000013   | 163      | −0.96              | −7.51                        | 1123 | 1688 | 0.282459                                           |
| TAL1-1-5                      | 0.110557                          | 0.000717   | 0.004045                          | 0.000023   | 0.282494                          | 0.000011   | 166      | −0.88              | −6.65                        | 1166 | 1635 | 0.282481                                           |
| TAL1-1-6                      | 0.067874                          | 0.000247   | 0.002344                          | 0.000011   | 0.282439                          | 0.000014   | 161      | −0.93              | −8.49                        | 1191 | 1748 | 0.282432                                           |
| TAL1-1-7                      | 0.047469                          | 0.000194   | 0.001734                          | 0.000006   | 0.282420                          | 0.000013   | 159      | −0.95              | −9.14                        | 1199 | 1789 | 0.282415                                           |
| TAL1-1-8                      | 0.048895                          | 0.000512   | 0.001794                          | 0.000014   | 0.282478                          | 0.000012   | 165      | −0.95              | −6.98                        | 1118 | 1656 | 0.282472                                           |
| TAL1-1-9                      | 0.041026                          | 0.000419   | 0.001462                          | 0.000012   | 0.282378                          | 0.000013   | 164      | −0.96              | −10.49                       | 1249 | 1877 | 0.282374                                           |
| TAL1-1-10                     | 0.041155                          | 0.000853   | 0.001407                          | 0.000035   | 0.282489                          | 0.000012   | 164      | −0.96              | −6.56                        | 1090 | 1629 | 0.282485                                           |
| TAL1-1-11                     | 0.045655                          | 0.000434   | 0.001614                          | 0.000009   | 0.282450                          | 0.000015   | 162      | −0.95              | −7.99                        | 1152 | 1718 | 0.282445                                           |
| TAL1-1-12                     | 0.029032                          | 0.000163   | 0.001072                          | 0.000004   | 0.282431                          | 0.000014   | 165      | −0.97              | −8.54                        | 1162 | 1755 | 0.282428                                           |
| TAL1-1-13                     | 0.046227                          | 0.000940   | 0.001677                          | 0.000028   | 0.282450                          | 0.000014   | 161      | −0.95              | −8.05                        | 1155 | 1721 | 0.282445                                           |
| TAL1-1-14                     | 0.039637                          | 0.000446   | 0.001440                          | 0.000009   | 0.282438                          | 0.000012   | 166      | −0.96              | −8.31                        | 1164 | 1742 | 0.282434                                           |
| Jiangyong pluton granodiorite |                                   |            |                                   |            |                                   |            |          |                    |                              |      |      |                                                    |
| Jiangyong-1-1                 | 0.030421                          | 0.000185   | 0.001090                          | 0.000009   | 0.282450                          | 0.000018   | 161      | −0.97              | −7.98                        | 1136 | 1717 | 0.282447                                           |
| Jiangyong-1-2                 | 0.056339                          | 0.000362   | 0.001918                          | 0.000010   | 0.282420                          | 0.000018   | 159      | −0.94              | −9.16                        | 1205 | 1789 | 0.282415                                           |
| Jiangyong-1-3                 | 0.045673                          | 0.000472   | 0.001641                          | 0.000016   | 0.282493                          | 0.000017   | 159      | −0.95              | −6.54                        | 1091 | 1624 | 0.282488                                           |
| Jiangyong-1-4                 | 0.046443                          | 0.000924   | 0.001638                          | 0.000024   | 0.282466                          | 0.000020   | 158      | −0.95              | −7.53                        | 1130 | 1686 | 0.282461                                           |
| Jiangyong-1-5                 | 0.026182                          | 0.000520   | 0.000926                          | 0.000017   | 0.282425                          | 0.000017   | 160      | −0.97              | −8.86                        | 1166 | 1771 | 0.282422                                           |
| Jiangyong-1-6                 | 0.031052                          | 0.000353   | 0.001142                          | 0.000011   | 0.282404                          | 0.000024   | 162      | −0.97              | −9.59                        | 1202 | 1819 | 0.282401                                           |
| Jiangyong-1-7                 | 0.060364                          | 0.000921   | 0.002121                          | 0.000033   | 0.282510                          | 0.000018   | 162      | −0.94              | −5.92                        | 1081 | 1587 | 0.282504                                           |
| Jiangyong-1-8                 | 0.053123                          | 0.000293   | 0.001862                          | 0.000008   | 0.282457                          | 0.000017   | 159      | −0.94              | −7.83                        | 1150 | 1706 | 0.282452                                           |
| Jiangyong-1-9                 | 0.044994                          | 0.000116   | 0.001628                          | 0.000005   | 0.282508                          | 0.000018   | 159      | −0.95              | −6.01                        | 1070 | 1590 | 0.282503                                           |
| Jiangyong-1-10                | 0.039582                          | 0.000465   | 0.001400                          | 0.000016   | 0.282490                          | 0.000019   | 163      | −0.96              | −6.56                        | 1089 | 1628 | 0.282486                                           |
| Jiangyong-1-11                | 0.045787                          | 0.000545   | 0.001608                          | 0.000019   | 0.282493                          | 0.000018   | 159      | −0.95              | −6.54                        | 1091 | 1624 | 0.282488                                           |
| Jiangyong-1-12                | 0.041541                          | 0.000327   | 0.001512                          | 0.000014   | 0.282529                          | 0.000020   | 160      | −0.95              | −5.25                        | 1037 | 1543 | 0.282524                                           |
| Jiangyong-1-13                | 0.033634                          | 0.000333   | 0.001172                          | 0.000012   | 0.282402                          | 0.000017   | 159      | −0.96              | −9.73                        | 1207 | 1826 | 0.282398                                           |
| Jiangyong-1-14                | 0.034093                          | 0.000518   | 0.001247                          | 0.000015   | 0.282413                          | 0.000020   | 162      | −0.96              | −9.30                        | 1194 | 1801 | 0.282409                                           |
| NO.2 granodiorite             |                                   |            |                                   |            |                                   |            |          |                    |                              |      |      |                                                    |
| TAL2-1-1                      | 0.051871                          | 0.000196   | 0.001892                          | 0.000005   | 0.282512                          | 0.000017   | 160      | −0.94              | −5.88                        | 1072 | 1582 | 0.282506                                           |
| TAL2-1-2                      | 0.042924                          | 0.000802   | 0.001542                          | 0.000028   | 0.282460                          | 0.000017   | 159      | −0.95              | −7.72                        | 1136 | 1698 | 0.282455                                           |
| TAL2-1-3                      | 0.043544                          | 0.001146   | 0.001520                          | 0.000035   | 0.282509                          | 0.000017   | 157      | −0.95              | −6.01                        | 1066 | 1589 | 0.282505                                           |
| TAL2-1-4                      | 0.046831                          | 0.000607   | 0.001683                          | 0.000017   | 0.282476                          | 0.000019   | 160      | −0.95              | −7.14                        | 1118 | 1663 | 0.282471                                           |
| TAL2-1-5                      | 0.043957                          | 0.000419   | 0.001672                          | 0.000011   | 0.282488                          | 0.000020   | 158      | −0.95              | −6.75                        | 1100 | 1636 | 0.282483                                           |
| TAL2-1-6                      | 0.036843                          | 0.000249   | 0.001414                          | 0.000009   | 0.282507                          | 0.000019   | 158      | −0.96              | −6.04                        | 1065 | 1591 | 0.282503                                           |
| TAL2-1-7                      | 0.028830                          | 0.000457   | 0.001104                          | 0.000019   | 0.282537                          | 0.000019   | 157      | −0.97              | −4.99                        | 1015 | 1524 | 0.282533                                           |
| TAL2-1-8                      | 0.061840                          | 0.000643   | 0.002152                          | 0.000020   | 0.282461                          | 0.000017   | 157      | −0.94              | −7.79                        | 1154 | 1701 | 0.282454                                           |
| TAL2-1-9                      | 0.040172                          | 0.000209   | 0.001453                          | 0.000006   | 0.282437                          | 0.000018   | 157      | −0.96              | −8.55                        | 1166 | 1750 | 0.282433                                           |
| TAL2-1-10                     | 0.041173                          | 0.000121   | 0.001546                          | 0.000005   | 0.282503                          | 0.000014   | 155      | −0.95              | −6.25                        | 1074 | 1603 | 0.282499                                           |
| TAL2-1-11                     | 0.036078                          | 0.000229   | 0.001349                          | 0.000009   | 0.282491                          | 0.000017   | 158      | −0.96              | −6.62                        | 1087 | 1628 | 0.282487                                           |
| TAL2-1-12                     | 0.042834                          | 0.000610   | 0.001648                          | 0.000021   | 0.282511                          | 0.000015   | 157      | −0.95              | −5.97                        | 1067 | 1586 | 0.282506                                           |
| TAL2-1-13                     | 0.042609                          | 0.000539   | 0.001570                          | 0.000018   | 0.282516                          | 0.000019   | 160      | −0.95              | −5.71                        | 1057 | 1572 | 0.282511                                           |
| TAL2-1-14                     | 0.034294                          | 0.000329   | 0.001290                          | 0.000011   | 0.282462                          | 0.000019   | 155      | −0.96              | −7.69                        | 1125 | 1694 | 0.282458                                           |
| NO.3 granodiorite             |                                   |            |                                   |            |                                   |            |          |                    |                              |      |      |                                                    |
| TAL3-1-1                      | 0.055367                          | 0.000342   | 0.001947                          | 0.000010   | 0.282450                          | 0.000019   | 155      | −0.94              | −8.17                        | 1162 | 1724 | 0.282445                                           |
| TAL3-1-2                      | 0.033403                          | 0.000157   | 0.001198                          | 0.000005   | 0.282490                          | 0.000017   | 155      | −0.96              | −6.70                        | 1083 | 1631 | 0.282486                                           |
| TAL3-1-3                      | 0.037419                          | 0.000575   | 0.001331                          | 0.000019   | 0.282429                          | 0.000020   | 154      | −0.96              | −8.90                        | 1174 | 1770 | 0.282425                                           |
| TAL3-1-4                      | 0.038697                          | 0.000220   | 0.001413                          | 0.000005   | 0.282464                          | 0.000020   | 155      | −0.96              | −7.62                        | 1126 | 1689 | 0.28246                                            |

Continued

| Spot                          | $^{176}\text{Yb}/^{177}\text{Hf}$ | $2\sigma$ | $^{176}\text{Lu}/^{177}\text{Hf}$ | $2\sigma$ | $^{176}\text{Hf}/^{177}\text{Hf}$ | $2\sigma$ | Age (Ma) | $f\text{Lu}/\text{Hf}$ | $\varepsilon\text{Hf}(t)$ | TDM1 | TDMC | $(^{176}\text{Hf}/^{177}\text{Hf})_i$ |
|-------------------------------|-----------------------------------|-----------|-----------------------------------|-----------|-----------------------------------|-----------|----------|------------------------|---------------------------|------|------|---------------------------------------|
| NO.3 granodiorite             |                                   |           |                                   |           |                                   |           |          |                        |                           |      |      |                                       |
| TAL3-1-5                      | 0.037198                          | 0.000402  | 0.001381                          | 0.000014  | 0.282483                          | 0.000017  | 155      | -0.96                  | -6.96                     | 1098 | 1648 | 0.282479                              |
| TAL3-1-6                      | 0.046248                          | 0.000557  | 0.001694                          | 0.000022  | 0.282456                          | 0.000021  | 156      | -0.95                  | -7.94                     | 1146 | 1710 | 0.282451                              |
| TAL3-1-7                      | 0.050539                          | 0.000486  | 0.001795                          | 0.000014  | 0.282462                          | 0.000021  | 156      | -0.95                  | -7.72                     | 1141 | 1696 | 0.282457                              |
| TAL3-1-8                      | 0.045731                          | 0.000319  | 0.001695                          | 0.000013  | 0.282494                          | 0.000020  | 155      | -0.95                  | -6.60                     | 1092 | 1624 | 0.282489                              |
| TAL3-1-9                      | 0.048521                          | 0.000731  | 0.001737                          | 0.000022  | 0.282492                          | 0.000018  | 154      | -0.95                  | -6.68                     | 1095 | 1629 | 0.282487                              |
| TAL3-1-10                     | 0.048375                          | 0.000532  | 0.001685                          | 0.000016  | 0.282536                          | 0.000018  | 154      | -0.95                  | -5.13                     | 1032 | 1531 | 0.282531                              |
| TAL3-1-11                     | 0.037488                          | 0.000277  | 0.001392                          | 0.000011  | 0.282471                          | 0.000017  | 154      | -0.96                  | -7.41                     | 1115 | 1675 | 0.282467                              |
| TAL3-1-12                     | 0.043792                          | 0.000293  | 0.001644                          | 0.000006  | 0.282534                          | 0.000017  | 155      | -0.95                  | -5.20                     | 1034 | 1535 | 0.282529                              |
| TAL3-1-13                     | 0.042752                          | 0.000534  | 0.001576                          | 0.000015  | 0.282461                          | 0.000018  | 153      | -0.95                  | -7.78                     | 1135 | 1698 | 0.282457                              |
| TAL3-1-14                     | 0.051587                          | 0.000648  | 0.002014                          | 0.000031  | 0.282448                          | 0.000021  | 154      | -0.94                  | -8.28                     | 1168 | 1730 | 0.282442                              |
| Tongshanling granite porphyry |                                   |           |                                   |           |                                   |           |          |                        |                           |      |      |                                       |
| GP-1-1                        | 0.033563                          | 0.001104  | 0.001272                          | 0.000038  | 0.282600                          | 0.000045  | 160      | -0.96                  | -2.69                     | 929  | 1380 | 0.282597                              |
| GP-1-2                        | 0.070181                          | 0.002391  | 0.002505                          | 0.000074  | 0.282585                          | 0.000054  | 160      | -0.92                  | -3.38                     | 984  | 1424 | 0.282577                              |
| GP-1-3                        | 0.054919                          | 0.001484  | 0.002049                          | 0.000064  | 0.282577                          | 0.000028  | 160      | -0.94                  | -3.60                     | 982  | 1438 | 0.282571                              |
| GP-1-4                        | 0.033265                          | 0.000577  | 0.001229                          | 0.000030  | 0.282631                          | 0.000028  | 161      | -0.96                  | -1.58                     | 885  | 1310 | 0.282627                              |
| GP-1-5                        | 0.047357                          | 0.002101  | 0.001697                          | 0.000080  | 0.282605                          | 0.000029  | 161      | -0.95                  | -2.56                     | 933  | 1373 | 0.282600                              |
| GP-1-6                        | 0.050814                          | 0.002126  | 0.001793                          | 0.000075  | 0.282610                          | 0.000024  | 165      | -0.95                  | -2.32                     | 929  | 1360 | 0.282604                              |
| GP-1-7                        | 0.058644                          | 0.000974  | 0.002130                          | 0.000041  | 0.282592                          | 0.000030  | 160      | -0.94                  | -3.09                     | 963  | 1405 | 0.282585                              |
| GP-1-8                        | 0.043409                          | 0.001483  | 0.001559                          | 0.000059  | 0.282590                          | 0.000030  | 163      | -0.95                  | -3.03                     | 951  | 1404 | 0.282585                              |

**Table S5.** Zircon trace elements compositions of Tongshanling granitoids.

| Sample No.       | Ti  | Hf    | Nb   | Ta  | Pb | Th  | U     | La    | Ce   | Pr   | Nd   | Sm   | Eu  | Gd | Tb | Dy  |
|------------------|-----|-------|------|-----|----|-----|-------|-------|------|------|------|------|-----|----|----|-----|
| Granodiorite     |     |       |      |     |    |     |       |       |      |      |      |      |     |    |    |     |
| TSL1-1-1         | 5.0 | 11740 | 6.9  | 3.2 | 32 | 457 | 1343  | 0.11  | 9.1  | 0.11 | 1.3  | 3.9  | 0.4 | 25 | 9  | 116 |
| TSL1-1-2         | 1.4 | 12990 | 7.7  | 6.0 | 41 | 266 | 1789  | 0.46  | 8.9  | 0.26 | 1.6  | 1.6  | 0.4 | 14 | 6  | 92  |
| TSL1-1-3         | 1.7 | 11660 | 12.1 | 6.3 | 46 | 481 | 1797  | 2.52  | 18.7 | 0.91 | 5.3  | 3.4  | 0.6 | 22 | 9  | 120 |
| TSL1-1-4         | 1.3 | 11540 | 2.8  | 1.7 | 10 | 90  | 356.2 | 1.29  | 8.9  | 0.55 | 2.8  | 1.9  | 0.4 | 10 | 4  | 57  |
| TSL1-1-5         | 1.7 | 12350 | 6.9  | 4.2 | 36 | 347 | 1545  | 0.79  | 10.2 | 0.29 | 2.1  | 2.9  | 0.4 | 19 | 7  | 101 |
| TSL1-1-6         | 3.8 | 11500 | 4.2  | 1.8 | 24 | 386 | 983   | 0.37  | 8.9  | 0.35 | 4.4  | 8.0  | 0.9 | 46 | 15 | 187 |
| TSL1-1-7         | 2.0 | 11730 | 9.8  | 4.5 | 32 | 396 | 1335  | 6.00  | 27.6 | 2.20 | 9.1  | 4.5  | 0.7 | 20 | 8  | 108 |
| TSL1-1-8         | 4.2 | 9340  | 3.5  | 1.0 | 99 | 343 | 449.9 | 0.03  | 15.9 | 0.48 | 8.0  | 15.6 | 2.2 | 98 | 31 | 378 |
| TSL1-1-9         | 7.1 | 10320 | 6.6  | 2.1 | 28 | 557 | 1108  | 0.01  | 9.2  | 0.16 | 2.8  | 7.2  | 0.7 | 43 | 15 | 189 |
| TSL1-1-10        | 2.0 | 12270 | 7.8  | 4.2 | 33 | 308 | 1162  | 3.50  | 19.3 | 1.43 | 6.6  | 3.5  | 0.5 | 18 | 7  | 99  |
| TSL1-1-11        | 3.6 | 10640 | 4.1  | 1.5 | 14 | 321 | 454.4 | 0.00  | 15.4 | 0.10 | 1.9  | 4.0  | 1.0 | 22 | 8  | 97  |
| TSL1-1-12        | 1.6 | 12310 | 6.3  | 4.9 | 48 | 440 | 2107  | 0.31  | 9.0  | 0.18 | 1.1  | 1.7  | 0.4 | 14 | 6  | 88  |
| TSL1-1-13        | 7.1 | 9920  | 2.9  | 1.0 | 11 | 159 | 353.5 | 0.01  | 3.5  | 0.05 | 0.9  | 2.4  | 0.3 | 20 | 7  | 86  |
| TSL1-1-14        | 2.2 | 11430 | 9.0  | 4.4 | 32 | 285 | 1341  | 0.28  | 9.8  | 0.13 | 1.1  | 2.5  | 0.5 | 21 | 8  | 135 |
| Granite porphyry |     |       |      |     |    |     |       |       |      |      |      |      |     |    |    |     |
| GP-1-1           | 4.6 | 10131 | 24.6 | 6.3 | 44 | 456 | 1613  | 0.29  | 30.1 | 0.16 | 2.3  | 4.9  | 2.5 | 31 | 11 | 131 |
| GP-1-2           | 2.5 | 10984 | 29.1 | 7.2 | 59 | 618 | 2169  | 0.05  | 21.2 | 0.08 | 1.0  | 3.5  | 1.5 | 24 | 9  | 114 |
| GP-1-3           | 2.8 | 10141 | 39.5 | 8.9 | 85 | 975 | 2993  | 3.23  | 38.3 | 1.24 | 7.8  | 6.5  | 2.3 | 38 | 13 | 150 |
| GP-1-4           | 4.7 | 10623 | 27.4 | 6.9 | 62 | 746 | 2200  | 0.27  | 25.9 | 0.17 | 1.7  | 3.3  | 1.8 | 27 | 10 | 125 |
| GP-1-5           | 4.4 | 10375 | 29.8 | 5.9 | 56 | 791 | 1882  | 0.66  | 34.3 | 0.69 | 5.2  | 6.7  | 2.7 | 32 | 11 | 138 |
| GP-1-6           | 2.8 | 11061 | 26.8 | 6.5 | 51 | 457 | 1875  | 0.11  | 17.6 | 0.07 | 0.8  | 2.3  | 1.3 | 19 | 8  | 101 |
| GP-1-7           | 1.8 | 11211 | 27.4 | 6.4 | 50 | 421 | 1756  | 0.06  | 16.5 | 0.05 | 0.8  | 2.5  | 1.2 | 19 | 8  | 103 |
| GP-1-8           | 3.8 | 11373 | 18.2 | 5.6 | 42 | 323 | 1501  | 0.05  | 14.3 | 0.05 | 0.7  | 2.1  | 0.9 | 17 | 6  | 74  |
| GP-1-9           | 2.0 | 11391 | 22.1 | 5.9 | 45 | 414 | 1627  | 0.10  | 15.5 | 0.06 | 0.5  | 2.0  | 1.2 | 16 | 7  | 85  |
| GP-1-10          | 3.4 | 10887 | 24.9 | 7.3 | 53 | 473 | 1910  | 0.15  | 17.9 | 0.11 | 1.1  | 2.5  | 1.4 | 22 | 8  | 102 |
| GP-1-11          | 5.4 | 10793 | 22.1 | 5.4 | 37 | 373 | 1307  | 0.39  | 19.2 | 0.19 | 1.6  | 3.2  | 1.3 | 20 | 7  | 97  |
| GP-1-12          | 3.9 | 9980  | 29.7 | 6.2 | 43 | 499 | 1532  | 9.39  | 58.0 | 2.90 | 15.5 | 7.5  | 2.8 | 35 | 13 | 154 |
| GP-1-13          | 2.4 | 10916 | 17.1 | 4.6 | 35 | 281 | 1264  | 23.63 | 70.6 | 8.43 | 40.9 | 12.5 | 2.9 | 23 | 6  | 72  |
| GP-1-14          | 4.9 | 11516 | 28.5 | 7.6 | 61 | 635 | 2201  | 0.03  | 23.6 | 0.08 | 0.7  | 3.2  | 1.7 | 25 | 9  | 117 |
| GP-1-15          | 2.1 | 11799 | 5.5  | 4.7 | 61 | 471 | 2182  | 9.71  | 33.5 | 3.45 | 17.8 | 6.5  | 1.2 | 20 | 6  | 87  |
| GP-1-16          | 3.5 | 11108 | 22.1 | 5.9 | 50 | 424 | 1809  | 0.09  | 15.9 | 0.06 | 0.7  | 3.0  | 1.2 | 18 | 7  | 91  |
| GP-1-17          | 4.0 | 10293 | 38.3 | 7.9 | 57 | 599 | 2069  | 0.11  | 27.9 | 0.06 | 1.2  | 4.0  | 1.9 | 28 | 11 | 137 |



Continued

| Sample No.       | Ho  | Er  | Tm  | Yb  | Lu  | Y    | ΣREE | Eu/Eu* | Ce/Ce* | T (°C) | Zircon<br>Ce <sup>4+</sup> /Ce <sup>3+</sup> | log fO <sub>2</sub> | error | ΔFMQ  | error |
|------------------|-----|-----|-----|-----|-----|------|------|--------|--------|--------|----------------------------------------------|---------------------|-------|-------|-------|
| Granodiorite     |     |     |     |     |     |      |      |        |        |        |                                              |                     |       |       |       |
| TSL1-1-1         | 46  | 231 | 51  | 468 | 95  | 1674 | 1054 | 0.13   | 20.5   | 715    | 91                                           | -19.0               | 1.18  | -2.24 | 1.18  |
| TSL1-1-2         | 39  | 209 | 49  | 467 | 98  | 1491 | 987  | 0.24   | 6.3    | 613    | 492                                          | -21.8               | 1.31  | -2.10 | 1.31  |
| TSL1-1-3         | 49  | 253 | 57  | 513 | 106 | 1837 | 1160 | 0.23   | 3.0    | 629    | 273                                          | -20.1               | 1.28  | -0.95 | 1.28  |
| TSL1-1-4         | 24  | 125 | 27  | 265 | 56  | 847  | 585  | 0.25   | 2.6    | 608    | 221                                          | -20.5               | 1.33  | -0.74 | 1.33  |
| TSL1-1-5         | 42  | 223 | 52  | 480 | 103 | 1609 | 1043 | 0.19   | 5.2    | 627    | 201                                          | -21.1               | 1.28  | -1.86 | 1.28  |
| TSL1-1-6         | 69  | 329 | 70  | 609 | 121 | 2460 | 1469 | 0.15   | 6.1    | 691    | 26                                           | -19.3               | 1.21  | -1.98 | 1.21  |
| TSL1-1-7         | 44  | 226 | 51  | 473 | 99  | 1625 | 1078 | 0.24   | 1.9    | 642    | 217                                          | -18.8               | 1.27  | -0.08 | 1.27  |
| TSL1-1-8         | 135 | 604 | 115 | 922 | 177 | 4636 | 2502 | 0.17   | 32.1   | 700    | 17                                           | -17.5               | 1.35  | -0.37 | 1.35  |
| TSL1-1-9         | 71  | 334 | 69  | 604 | 118 | 2506 | 1463 | 0.13   | 49.3   | 747    | 32                                           | -18.1               | 1.15  | -2.13 | 1.15  |
| TSL1-1-10        | 40  | 201 | 45  | 422 | 87  | 1458 | 953  | 0.21   | 2.1    | 642    | 223                                          | -19.3               | 1.27  | -0.58 | 1.27  |
| TSL1-1-11        | 37  | 183 | 39  | 356 | 72  | 1332 | 835  | 0.32   | 274.3  | 687    | 110                                          | -17.9               | 1.37  | -0.45 | 1.37  |
| TSL1-1-12        | 37  | 193 | 46  | 432 | 89  | 1408 | 917  | 0.24   | 9.4    | 624    | 413                                          | -21.6               | 1.29  | -2.31 | 1.29  |
| TSL1-1-13        | 34  | 168 | 35  | 325 | 64  | 1230 | 744  | 0.15   | 44.8   | 747    | 58                                           | -18.7               | 1.23  | -2.73 | 1.23  |
| TSL1-1-14        | 55  | 289 | 65  | 620 | 127 | 2130 | 1335 | 0.23   | 12.5   | 649    | 297                                          | -20.3               | 1.26  | -1.77 | 1.26  |
| Granite porphyry |     |     |     |     |     |      |      |        |        |        |                                              |                     |       |       |       |
| GP-1-1           | 49  | 229 | 51  | 493 | 106 | 1501 | 1142 | 0.62   | 33.9   | 738    | 105                                          | -17.7               | 1.16  | -1.52 | 1.16  |
| GP-1-2           | 45  | 215 | 48  | 477 | 99  | 1375 | 1058 | 0.51   | 79.0   | 683    | 136                                          | -19.9               | 1.22  | -2.35 | 1.22  |
| GP-1-3           | 58  | 271 | 59  | 580 | 119 | 1777 | 1347 | 0.45   | 4.7    | 694    | 86                                           | -18.9               | 1.20  | -1.60 | 1.20  |
| GP-1-4           | 48  | 233 | 51  | 502 | 106 | 1469 | 1135 | 0.57   | 29.5   | 739    | 196                                          | -18.3               | 1.15  | -2.16 | 1.15  |
| GP-1-5           | 53  | 253 | 56  | 553 | 116 | 1622 | 1261 | 0.56   | 12.4   | 733    | 72                                           | -17.9               | 1.16  | -1.57 | 1.16  |
| GP-1-6           | 41  | 201 | 47  | 470 | 104 | 1270 | 1013 | 0.58   | 50.7   | 693    | 266                                          | -19.8               | 1.20  | -2.52 | 1.20  |
| GP-1-7           | 41  | 204 | 47  | 479 | 106 | 1412 | 1027 | 0.54   | 70.4   | 658    | 217                                          | -20.8               | 1.25  | -2.50 | 1.25  |
| GP-1-8           | 30  | 147 | 35  | 355 | 76  | 943  | 758  | 0.46   | 71.1   | 720    | 189                                          | -19.4               | 1.17  | -2.74 | 1.17  |
| GP-1-9           | 34  | 167 | 38  | 371 | 81  | 1041 | 818  | 0.63   | 46.5   | 668    | 233                                          | -20.6               | 1.23  | -2.59 | 1.23  |
| GP-1-10          | 39  | 188 | 43  | 424 | 90  | 1215 | 940  | 0.58   | 33.5   | 710    | 199                                          | -19.4               | 1.19  | -2.54 | 1.19  |
| GP-1-11          | 38  | 181 | 41  | 405 | 84  | 1155 | 900  | 0.48   | 17.5   | 753    | 123                                          | -18.0               | 1.14  | -2.21 | 1.14  |
| GP-1-12          | 59  | 278 | 61  | 597 | 127 | 1823 | 1421 | 0.54   | 2.7    | 723    | 108                                          | -16.9               | 1.17  | -0.34 | 1.17  |
| GP-1-13          | 27  | 132 | 31  | 309 | 67  | 847  | 826  | 0.52   | 1.2    | 682    | 27                                           | -17.3               | 1.22  | 0.31  | 1.22  |
| GP-1-14          | 46  | 215 | 48  | 476 | 101 | 1388 | 1066 | 0.57   | 115.5  | 744    | 182                                          | -18.4               | 1.15  | -2.35 | 1.15  |
| GP-1-15          | 36  | 187 | 45  | 465 | 104 | 1126 | 1021 | 0.34   | 1.4    | 670    | 71                                           | -19.5               | 1.23  | -1.50 | 1.23  |
| GP-1-16          | 36  | 175 | 40  | 396 | 86  | 1149 | 870  | 0.50   | 52.7   | 713    | 124                                          | -19.5               | 1.18  | -2.70 | 1.18  |
| GP-1-17          | 53  | 256 | 58  | 565 | 118 | 1653 | 1260 | 0.56   | 84.7   | 725    | 162                                          | -18.4               | 1.17  | -1.87 | 1.17  |

**Table S6.** The whole rock Sr–Nd isotopic compositions of Tongshanling granitoids

| Sample No.                                | JY-1                   | JY-2     | JY-3     | TSL3-1            | TSL3-2   | TSL3-3   | GP-1             | GP-2     | GP-3     |
|-------------------------------------------|------------------------|----------|----------|-------------------|----------|----------|------------------|----------|----------|
| Granite type                              | Jiangyong granodiorite |          |          | No.3 granodiorite |          |          | Granite porphyry |          |          |
| t                                         | 160                    | 160      | 160      | 155               | 155      | 155      | 161              | 161      | 161      |
| Rb                                        | 163                    | 168      | 140      | 201               | 144      | 140      | 391              | 246      | 238      |
| Sr                                        | 300                    | 322      | 319      | 251               | 464      | 330      | 114              | 255      | 219      |
| $^{87}\text{Rb}/^{86}\text{Sr}$           | 1.57                   | 1.51     | 1.27     | 2.32              | 0.89     | 1.22     | 9.98             | 2.79     | 3.15     |
| $^{87}\text{Sr}/^{86}\text{Sr}$           | 0.71399                | 0.71370  | 0.71378  | 0.71625           | 0.71278  | 0.71419  |                  |          |          |
| Initial $^{87}\text{Sr}/^{86}\text{Sr}$   | 0.71043                | 0.71027  | 0.71091  | 0.71115           | 0.71081  | 0.71150  |                  |          |          |
| Sm                                        | 5.14                   | 4.99     | 5.31     | 5.30              | 5.92     | 5.75     | 4.14             | 4.20     | 4.13     |
| Nd                                        | 25.6                   | 25.5     | 26.7     | 27.1              | 30.4     | 27.4     | 24.2             | 23.4     | 24.0     |
| $^{147}\text{Sm}/^{144}\text{Nd}$         | 0.121313               | 0.118235 | 0.120162 | 0.118165          | 0.117661 | 0.126795 | 0.103419         | 0.108505 | 0.104029 |
| $^{143}\text{Nd}/^{144}\text{Nd}$         | 0.512174               | 0.512156 | 0.512171 | 0.512158          | 0.51218  | 0.512154 | 0.512411         | 0.512396 | 0.512397 |
| Initial $^{143}\text{Nd}/^{144}\text{Nd}$ | 0.512047               | 0.512032 | 0.512045 | 0.512038          | 0.512061 | 0.512025 | 0.512302         | 0.512282 | 0.512287 |
| $\epsilon\text{Nd}(t)$                    | -7.51                  | -7.80    | -7.55    | -7.81             | -7.37    | -8.06    | -2.51            | -2.90    | -2.81    |
| $T_{\text{DM}}^2$ (Ma)                    | 1559                   | 1582     | 1562     | 1579              | 1543     | 1598     | 1154             | 1187     | 1177     |
